# Supplementary material
Source: MDPI journal article supplement (https://www.mdpi.com/2227-7390/9/19/2517)
Supplement: s1 [file s1]

Table S1. The accuracy measures for the 2 points ahead predictions the volume index of production in construction

|             | Abbasov-Mametova |       |       |      | NFTS  |       |       |       | SES   |       |       |       | Holt  |       |       |      | ARIMA |       |       |      |
|-------------|------------------|-------|-------|------|-------|-------|-------|-------|-------|-------|-------|-------|-------|-------|-------|------|-------|-------|-------|------|
| Country     | MAE              | MAPE  | RMSE  | MASE | MAE   | MAPE  | RMSE  | MASE  | MAE   | MAPE  | RMSE  | MASE  | MAE   | MAPE  | RMSE  | MASE | MAE   | MAPE  | RMSE  | MASE |
| Belgium     | 1.25             | 1.24  | 1.25  | 0.66 | 1.16  | 1.16  | 1.17  | 0.61  | 0.95  | 0.94  | 0.95  | 0.50  | 0.81  | 0.81  | 1.07  | 0.43 | 0.51  | 0.50  | 0.54  | 0.27 |
| Bulgaria    | 0.45             | 0.49  | 0.47  | 0.89 | 0.54  | 0.59  | 0.69  | 1.07  | 0.25  | 0.28  | 0.35  | 0.50  | 0.74  | 0.83  | 0.75  | 1.49 | 0.61  | 0.68  | 0.63  | 1.22 |
| Czechia     | 1.50             | 1.33  | 1.50  | 1.50 | 2.32  | 2.04  | 2.32  | 2.32  | 0.50  | 0.45  | 0.57  | 0.50  | 0.55  | 0.49  | 0.59  | 0.55 | 0.72  | 0.64  | 0.86  | 0.72 |
| Denmark     | 7.22             | 6.69  | 7.89  | 2.41 | 6.64  | 6.09  | 7.04  | 2.21  | 1.50  | 1.31  | 1.89  | 0.50  | 1.51  | 1.30  | 1.52  | 0.50 | 1.91  | 1.63  | 2.07  | 0.64 |
| Germany     | 4.40             | 3.87  | 4.59  | 2.75 | 4.67  | 4.11  | 4.80  | 2.92  | 5.66  | 5.02  | 5.71  | 3.54  | 5.02  | 4.43  | 5.10  | 3.14 | 5.35  | 4.74  | 5.36  | 3.34 |
| Spain       | 1.08             | 1.11  | 1.08  | 0.54 | 1.08  | 1.12  | 1.11  | 0.54  | 3.28  | 3.28  | 3.42  | 1.64  | 1.79  | 1.84  | 1.80  | 0.89 | 4.98  | 4.90  | 5.01  | 2.49 |
| France      | 3.20             | 3.25  | 3.30  | 3.56 | 4.18  | 4.28  | 4.26  | 4.65  | 0.85  | 0.83  | 0.96  | 0.95  | 1.40  | 1.36  | 1.47  | 1.56 | 0.85  | 0.83  | 0.96  | 0.95 |
| Croatia     | 2.40             | 1.88  | 2.73  | 0.71 | 1.47  | 1.15  | 1.96  | 0.43  | 4.32  | 3.45  | 4.64  | 1.27  | 4.64  | 3.71  | 4.84  | 1.36 | 4.32  | 3.44  | 4.54  | 1.27 |
| Italy       | 3.62             | 3.39  | 4.01  | 1.21 | 3.03  | 2.82  | 3.48  | 1.01  | 5.71  | 5.44  | 5.90  | 1.90  | 4.39  | 4.13  | 4.67  | 1.46 | 5.70  | 5.43  | 5.89  | 1.90 |
| Luxembourg  | 12.38            | 11.51 | 12.97 | 1.00 | 6.92  | 6.13  | 8.78  | 0.56  | 8.77  | 7.94  | 10.74 | 0.71  | 8.48  | 7.66  | 10.51 | 0.68 | 7.56  | 6.84  | 10.48 | 0.61 |
| Hungary     | 10.93            | 7.49  | 15.07 | 0.53 | 11.51 | 7.96  | 15.92 | 0.56  | 10.25 | 6.89  | 12.99 | 0.50  | 9.38  | 6.11  | 10.09 | 0.46 | 10.25 | 6.90  | 13.22 | 0.50 |
| Netherlands | 4.37             | 3.42  | 4.44  | 5.47 | 3.81  | 2.97  | 3.88  | 4.76  | 4.57  | 3.58  | 4.59  | 5.71  | 1.61  | 1.23  | 1.72  | 2.01 | 4.60  | 3.60  | 4.62  | 5.75 |
| Austria     | 0.60             | 0.47  | 0.63  | 6.00 | 0.55  | 0.43  | 0.75  | 5.48  | 1.96  | 1.56  | 1.96  | 19.62 | 0.32  | 0.25  | 0.40  | 3.19 | 0.36  | 0.28  | 0.39  | 3.63 |
| Poland      | 9.60             | 8.11  | 9.67  | 2.82 | 8.96  | 7.53  | 9.04  | 2.63  | 10.24 | 8.70  | 10.38 | 3.01  | 7.16  | 5.93  | 7.49  | 2.10 | 6.75  | 5.57  | 6.98  | 1.98 |
| Portugal    | 0.93             | 0.90  | 0.93  | 0.51 | 0.93  | 0.90  | 0.94  | 0.51  | 0.90  | 0.87  | 0.90  | 0.50  | 0.85  | 0.82  | 0.86  | 0.47 | 0.90  | 0.87  | 0.90  | 0.50 |
| Romania     | 19.08            | 16.77 | 19.49 | 3.82 | 18.82 | 16.48 | 19.13 | 3.76  | 22.30 | 20.11 | 22.44 | 4.46  | 21.59 | 19.35 | 21.76 | 4.32 | 22.30 | 20.11 | 22.44 | 4.46 |
| Slovenia    | 12.91            | 10.07 | 13.55 | 2.75 | 16.62 | 13.33 | 17.12 | 3.54  | 12.28 | 9.48  | 12.50 | 2.61  | 19.36 | 15.86 | 19.71 | 4.12 | 11.36 | 8.73  | 11.39 | 2.42 |
| Slovakia    | 9.02             | 10.11 | 9.26  | 3.92 | 9.49  | 10.68 | 9.67  | 4.13  | 3.95  | 4.18  | 4.11  | 1.72  | 3.26  | 3.43  | 3.44  | 1.42 | 6.35  | 6.89  | 6.45  | 2.76 |
| Finland     | 2.95             | 2.60  | 3.04  | 5.90 | 2.49  | 2.19  | 2.54  | 4.98  | 1.67  | 1.46  | 1.69  | 3.35  | 0.83  | 0.72  | 0.85  | 1.66 | 1.66  | 1.45  | 1.68  | 3.32 |
| Sweden      | 3.28             | 2.59  | 3.38  | 8.19 | 4.22  | 3.32  | 4.29  | 10.56 | 0.65  | 0.53  | 0.68  | 1.62  | 1.96  | 1.62  | 1.97  | 4.91 | 1.63  | 1.31  | 1.68  | 4.07 |

Table S2. The accuracy measures for the 2 points ahead predictions of the volume index of production in industry for electricity, gas, steam and air conditioning supply

|          | Abbasov-Mametova |      |       |      | NFTS  |      |       |      | SES   |       |       |      | Holt |       |      |      | ARIMA |       |       |      |
|----------|------------------|------|-------|------|-------|------|-------|------|-------|-------|-------|------|------|-------|------|------|-------|-------|-------|------|
| Country  | MAE              | MAPE | RMSE  | MASE | MAE   | MAPE | RMSE  | MASE | MAE   | MAPE  | RMSE  | MASE | MAE  | MAPE  | RMSE | MASE | MAE   | MAPE  | RMSE  | MASE |
| Belgium  | 10.65            | 7.76 | 10.65 | 3.67 | 11.75 | 8.50 | 11.76 | 4.05 | 7.31  | 5.46  | 7.45  | 2.52 | 7.87 | 5.85  | 7.97 | 2.71 | 0.60  | 0.48  | 0.79  | 0.21 |
| Bulgaria | 0.58             | 0.77 | 0.78  | 1.15 | 1.18  | 1.60 | 1.32  | 2.37 | 0.50  | 0.66  | 0.56  | 1.00 | 0.57 | 0.75  | 0.68 | 1.14 | 0.64  | 0.86  | 0.89  | 1.29 |
| Czechia  | 1.95             | 1.89 | 1.95  | 0.81 | 0.89  | 0.87 | 0.94  | 0.37 | 5.04  | 4.73  | 5.18  | 2.10 | 6.94 | 6.40  | 7.05 | 2.89 | 4.21  | 3.98  | 4.42  | 1.76 |
| Denmark  | 8.58             | 8.72 | 8.59  | 2.45 | 8.27  | 8.37 | 8.27  | 2.36 | 4.71  | 4.60  | 5.03  | 1.35 | 9.83 | 10.10 | 9.96 | 2.81 | 4.71  | 4.60  | 5.03  | 1.35 |
| Germany  | 0.75             | 0.83 | 0.87  | 1.88 | 1.23  | 1.36 | 1.31  | 3.07 | 0.20  | 0.22  | 0.26  | 0.50 | 0.36 | 0.40  | 0.49 | 0.91 | 0.20  | 0.22  | 0.20  | 0.50 |
| Estonia  | 7.07             | 9.51 | 7.78  | 1.77 | 5.01  | 6.91 | 5.93  | 1.25 | 11.00 | 14.16 | 11.18 | 2.75 | 9.06 | 11.93 | 9.44 | 2.26 | 11.00 | 14.16 | 11.18 | 2.75 |
| Ireland  | 4.34             | 3.41 | 4.86  | 0.53 | 3.54  | 2.80 | 4.60  | 0.43 | 4.10  | 3.38  | 4.91  | 0.50 | 3.96 | 3.22  | 4.09 | 0.48 | 4.10  | 3.33  | 4.18  | 0.50 |

|             |       |       |       |      |       |       |       |      |       |       |       |       |       |       |       |       |       |       |       |       |
|-------------|-------|-------|-------|------|-------|-------|-------|------|-------|-------|-------|-------|-------|-------|-------|-------|-------|-------|-------|-------|
| Greece      | 15.13 | 17.87 | 15.44 | 1.68 | 17.16 | 20.78 | 17.45 | 1.91 | 7.60  | 8.28  | 8.84  | 0.84  | 6.54  | 7.02  | 7.77  | 0.73  | 11.00 | 12.43 | 11.88 | 1.22  |
| Spain       | 0.42  | 0.47  | 0.43  | 0.20 | 1.68  | 1.91  | 1.68  | 0.80 | 7.06  | 7.32  | 7.14  | 3.36  | 6.24  | 6.52  | 6.31  | 2.97  | 9.05  | 9.16  | 9.32  | 4.31  |
| France      | 2.83  | 2.85  | 2.86  | 0.97 | 0.94  | 0.96  | 1.31  | 0.32 | 3.66  | 3.65  | 3.93  | 1.26  | 3.21  | 3.22  | 3.53  | 1.11  | 2.82  | 2.83  | 3.57  | 0.97  |
| Croatia     | 1.25  | 1.12  | 1.46  | 2.50 | 2.76  | 2.52  | 2.98  | 5.52 | 5.30  | 4.49  | 5.31  | 10.60 | 6.44  | 5.40  | 6.44  | 12.88 | 2.58  | 2.25  | 2.82  | 5.17  |
| Italy       | 0.80  | 0.82  | 0.94  | 0.73 | 0.90  | 0.92  | 1.03  | 0.82 | 5.13  | 4.97  | 5.16  | 4.67  | 3.55  | 3.49  | 3.59  | 3.23  | 4.78  | 4.60  | 5.09  | 4.34  |
| Cyprus      | 6.88  | 6.26  | 7.51  | 0.97 | 6.59  | 5.98  | 7.29  | 0.93 | 5.59  | 5.03  | 6.62  | 0.79  | 5.67  | 5.11  | 6.69  | 0.80  | 6.16  | 5.58  | 6.96  | 0.87  |
| Latvia      | 7.60  | 7.22  | 8.07  | 1.19 | 8.45  | 7.96  | 8.88  | 1.32 | 11.57 | 10.58 | 12.01 | 1.81  | 11.04 | 10.14 | 11.52 | 1.73  | 12.78 | 11.58 | 12.81 | 2.00  |
| Lithuania   | 6.08  | 6.16  | 6.11  | 0.62 | 5.92  | 6.09  | 5.95  | 0.60 | 4.90  | 4.77  | 6.91  | 0.50  | 5.68  | 5.49  | 7.49  | 0.58  | 4.90  | 4.77  | 6.89  | 0.50  |
| Luxembourg  | 3.28  | 3.75  | 4.41  | 0.60 | 3.37  | 3.85  | 4.46  | 0.61 | 3.15  | 3.61  | 4.18  | 0.57  | 2.47  | 2.88  | 3.19  | 0.45  | 2.52  | 2.94  | 2.89  | 0.46  |
| Hungary     | 1.58  | 1.61  | 1.58  | 0.99 | 2.63  | 2.71  | 2.63  | 1.64 | 0.80  | 0.81  | 0.92  | 0.50  | 0.58  | 0.58  | 0.58  | 0.36  | 2.80  | 2.82  | 2.81  | 1.75  |
| Malta       | 42.20 | 26.19 | 42.45 | 3.87 | 43.61 | 27.31 | 43.86 | 4.00 | 46.74 | 29.86 | 47.06 | 4.29  | 40.91 | 25.23 | 41.44 | 3.75  | 45.97 | 29.30 | 46.59 | 4.22  |
| Netherlands | 7.53  | 6.05  | 7.54  | 3.42 | 6.61  | 5.28  | 6.64  | 3.01 | 9.54  | 7.79  | 9.60  | 4.33  | 13.48 | 11.40 | 13.66 | 6.13  | 9.40  | 7.67  | 9.46  | 4.27  |
| Austria     | 1.58  | 1.27  | 2.16  | 0.37 | 2.35  | 1.88  | 2.87  | 0.55 | 2.15  | 1.76  | 2.35  | 0.50  | 1.95  | 1.59  | 1.98  | 0.45  | 2.15  | 1.75  | 2.16  | 0.50  |
| Poland      | 1.43  | 1.28  | 1.56  | 0.89 | 1.77  | 1.58  | 1.88  | 1.11 | 3.31  | 2.91  | 3.41  | 2.07  | 6.36  | 5.45  | 6.37  | 3.97  | 0.90  | 0.81  | 1.20  | 0.56  |
| Portugal    | 27.97 | 19.47 | 31.25 | 1.34 | 32.39 | 21.95 | 35.01 | 1.56 | 15.31 | 11.84 | 18.51 | 0.74  | 15.92 | 12.24 | 19.09 | 0.77  | 7.94  | 6.66  | 11.01 | 0.38  |
| Romania     | 0.45  | 0.47  | 0.64  | 0.35 | 0.86  | 0.90  | 0.97  | 0.66 | 0.65  | 0.68  | 0.83  | 0.50  | 1.24  | 1.31  | 1.34  | 0.96  | 0.99  | 1.02  | 1.18  | 0.76  |
| Slovenia    | 10.59 | 10.58 | 11.40 | 2.30 | 8.20  | 8.43  | 8.76  | 1.78 | 7.07  | 7.37  | 7.43  | 1.54  | 6.31  | 6.64  | 6.70  | 1.37  | 10.53 | 10.60 | 10.78 | 2.29  |
| Slovakia    | 4.15  | 3.80  | 4.16  | 8.30 | 4.35  | 3.99  | 4.37  | 8.70 | 4.02  | 3.67  | 4.03  | 8.04  | 4.15  | 3.80  | 4.16  | 8.31  | 5.10  | 4.71  | 5.18  | 10.20 |
| Finland     | 2.01  | 2.04  | 2.54  | 1.34 | 1.69  | 1.72  | 2.18  | 1.12 | 3.13  | 3.16  | 3.22  | 2.09  | 3.25  | 3.28  | 3.33  | 2.17  | 3.43  | 3.46  | 3.51  | 2.29  |
| Sweden      | 0.75  | 0.72  | 0.75  | 3.75 | 0.85  | 0.81  | 0.85  | 4.25 | 1.04  | 0.99  | 1.05  | 5.20  | 0.41  | 0.39  | 0.41  | 2.05  | 0.21  | 0.20  | 0.25  | 1.06  |
| Norway      | 4.45  | 5.06  | 5.95  | 0.51 | 4.45  | 5.07  | 6.02  | 0.51 | 4.40  | 4.94  | 5.20  | 0.50  | 4.56  | 5.15  | 5.61  | 0.52  | 3.74  | 4.15  | 4.36  | 0.43  |
| Switzerland | 12.30 | 13.35 | 12.43 | 3.73 | 13.67 | 15.00 | 13.69 | 4.14 | 2.23  | 2.08  | 2.78  | 0.68  | 3.13  | 2.89  | 3.62  | 0.95  | 5.43  | 5.07  | 5.58  | 1.65  |

Table S3. The accuracy measures for the 2 points ahead predictions of the index of deflated turnover in retail trade, except of motor vehicles and motorcycles

|          | Abbasov-Mametova |      |       |      | NFTS  |      |       |      | SES  |      |      |      | Holt |      |      |      | ARIMA |      |      |      |
|----------|------------------|------|-------|------|-------|------|-------|------|------|------|------|------|------|------|------|------|-------|------|------|------|
| Country  | MAE              | MAPE | RMSE  | MASE | MAE   | MAPE | RMSE  | MASE | MAE  | MAPE | RMSE | MASE | MAE  | MAPE | RMSE | MASE | MAE   | MAPE | RMSE | MASE |
| Belgium  | 2.02             | 1.98 | 2.21  | 1.35 | 2.25  | 2.19 | 2.42  | 1.50 | 1.18 | 1.16 | 1.40 | 0.78 | 2.32 | 2.26 | 2.51 | 1.55 | 1.58  | 1.55 | 1.81 | 1.05 |
| Bulgaria | 11.03            | 8.22 | 11.06 | 7.88 | 12.51 | 9.23 | 12.52 | 8.93 | 5.38 | 4.19 | 5.43 | 3.84 | 1.77 | 1.42 | 1.82 | 1.27 | 1.31  | 1.06 | 1.40 | 0.94 |
| Czechia  | 0.35             | 0.28 | 0.49  | 1.75 | 0.88  | 0.70 | 0.95  | 4.40 | 0.72 | 0.58 | 0.73 | 3.60 | 0.33 | 0.27 | 0.43 | 1.67 | 0.47  | 0.38 | 0.63 | 2.36 |
| Denmark  | 0.80             | 0.77 | 1.06  | 0.62 | 0.71  | 0.69 | 1.00  | 0.55 | 0.65 | 0.62 | 0.70 | 0.50 | 0.70 | 0.66 | 0.92 | 0.54 | 0.65  | 0.62 | 0.70 | 0.50 |
| Germany  | 1.17             | 1.06 | 1.20  | 2.35 | 1.12  | 1.01 | 1.15  | 2.25 | 0.90 | 0.81 | 0.94 | 1.81 | 0.14 | 0.12 | 0.14 | 0.27 | 0.24  | 0.21 | 0.24 | 0.48 |
| Estonia  | 3.88             | 3.48 | 3.96  | 3.88 | 3.84  | 3.44 | 3.90  | 3.84 | 2.82 | 2.51 | 2.86 | 2.82 | 2.26 | 2.00 | 2.29 | 2.26 | 2.29  | 2.02 | 2.32 | 2.29 |
| Ireland  | 2.88             | 2.31 | 3.21  | 1.15 | 3.22  | 2.59 | 3.53  | 1.29 | 2.08 | 1.69 | 2.43 | 0.83 | 2.14 | 1.73 | 2.60 | 0.86 | 3.07  | 2.46 | 3.41 | 1.23 |
| Greece   | 2.12             | 2.09 | 2.25  | 1.77 | 2.00  | 1.96 | 2.12  | 1.67 | 0.75 | 0.72 | 0.96 | 0.62 | 0.64 | 0.62 | 0.83 | 0.53 | 0.78  | 0.75 | 0.78 | 0.65 |

|             |      |      |      |      |      |      |      |      |      |      |      |      |      |      |      |      |      |      |      |      |
|-------------|------|------|------|------|------|------|------|------|------|------|------|------|------|------|------|------|------|------|------|------|
| Spain       | 1.95 | 1.82 | 2.00 | 2.79 | 2.30 | 2.16 | 2.35 | 3.29 | 0.72 | 0.66 | 0.80 | 1.02 | 0.28 | 0.26 | 0.29 | 0.40 | 0.86 | 0.79 | 0.89 | 1.22 |
| France      | 0.52 | 0.46 | 0.54 | 5.25 | 0.38 | 0.33 | 0.40 | 3.75 | 0.39 | 0.34 | 0.39 | 3.87 | 0.58 | 0.51 | 0.60 | 5.84 | 0.65 | 0.57 | 0.68 | 6.53 |
| Croatia     | 0.35 | 0.30 | 0.35 | 0.88 | 0.48 | 0.41 | 0.48 | 1.19 | 0.75 | 0.65 | 0.78 | 1.88 | 0.49 | 0.42 | 0.63 | 1.23 | 0.23 | 0.20 | 0.25 | 0.57 |
| Cyprus      | 1.45 | 1.15 | 1.52 | 7.25 | 1.24 | 0.98 | 1.27 | 6.18 | 0.10 | 0.08 | 0.14 | 0.52 | 1.66 | 1.31 | 1.67 | 8.28 | 1.77 | 1.40 | 1.79 | 8.84 |
| Latvia      | 3.18 | 2.78 | 4.06 | 0.69 | 3.33 | 2.92 | 4.14 | 0.72 | 2.91 | 2.54 | 3.71 | 0.63 | 2.56 | 2.23 | 3.34 | 0.56 | 2.54 | 2.21 | 3.33 | 0.55 |
| Lithuania   | 1.62 | 1.27 | 1.95 | 0.71 | 1.47 | 1.15 | 1.83 | 0.64 | 2.34 | 1.84 | 2.61 | 1.02 | 1.30 | 1.01 | 1.58 | 0.56 | 1.04 | 0.81 | 1.36 | 0.45 |
| Luxembourg  | 0.25 | 0.76 | 0.25 | 1.25 | 0.25 | 0.76 | 0.25 | 1.24 | 0.62 | 1.90 | 0.62 | 3.08 | 0.29 | 0.88 | 0.29 | 1.45 | 0.30 | 0.93 | 0.31 | 1.52 |
| Hungary     | 1.25 | 0.96 | 1.46 | 0.45 | 1.25 | 0.96 | 1.33 | 0.45 | 1.40 | 1.08 | 1.84 | 0.50 | 1.08 | 0.83 | 1.21 | 0.39 | 1.01 | 0.78 | 1.05 | 0.36 |
| Malta       | 2.13 | 1.78 | 2.59 | 0.54 | 2.46 | 2.07 | 2.97 | 0.63 | 3.15 | 2.67 | 3.71 | 0.81 | 1.75 | 1.46 | 2.45 | 0.45 | 1.37 | 1.13 | 1.90 | 0.35 |
| Netherlands | 0.85 | 0.76 | 1.07 | 0.43 | 0.98 | 0.87 | 1.30 | 0.49 | 1.00 | 0.90 | 1.01 | 0.50 | 0.89 | 0.80 | 0.90 | 0.44 | 0.61 | 0.55 | 0.64 | 0.31 |
| Austria     | 1.20 | 1.15 | 1.63 | 0.57 | 1.30 | 1.25 | 1.70 | 0.62 | 1.16 | 1.11 | 1.56 | 0.55 | 0.96 | 0.92 | 1.11 | 0.46 | 1.07 | 1.03 | 1.31 | 0.51 |
| Poland      | 4.70 | 3.70 | 4.73 | 7.83 | 5.05 | 3.99 | 5.07 | 8.41 | 3.69 | 2.89 | 3.71 | 6.16 | 2.66 | 2.06 | 2.66 | 4.44 | 2.94 | 2.28 | 2.94 | 4.90 |
| Portugal    | 4.30 | 3.64 | 4.74 | 0.98 | 3.94 | 3.32 | 4.42 | 0.89 | 4.74 | 4.03 | 5.23 | 1.08 | 3.47 | 2.92 | 4.01 | 0.79 | 3.25 | 2.73 | 3.98 | 0.74 |
| Romania     | 4.13 | 2.81 | 4.23 | 2.95 | 3.80 | 2.57 | 3.91 | 2.71 | 4.80 | 3.27 | 4.85 | 3.43 | 3.72 | 2.52 | 3.88 | 2.66 | 3.54 | 2.39 | 3.71 | 2.53 |
| Slovenia    | 1.56 | 1.30 | 1.56 | 0.92 | 1.24 | 1.04 | 1.27 | 0.73 | 0.85 | 0.71 | 0.93 | 0.50 | 0.95 | 0.79 | 0.95 | 0.56 | 0.95 | 0.79 | 1.27 | 0.56 |
| Slovakia    | 2.03 | 1.80 | 2.45 | 0.81 | 2.09 | 1.86 | 2.49 | 0.84 | 1.86 | 1.65 | 2.24 | 0.74 | 1.54 | 1.36 | 1.92 | 0.62 | 1.65 | 1.46 | 2.07 | 0.66 |
| Finland     | 1.73 | 1.58 | 1.98 | 1.15 | 1.53 | 1.40 | 1.78 | 1.02 | 1.27 | 1.15 | 1.47 | 0.84 | 0.65 | 0.59 | 0.92 | 0.44 | 1.06 | 0.96 | 1.20 | 0.71 |
| Sweden      | 0.12 | 0.11 | 0.15 | 0.42 | 0.07 | 0.07 | 0.08 | 0.25 | 0.88 | 0.82 | 0.90 | 2.94 | 0.28 | 0.25 | 0.29 | 0.92 | 0.35 | 0.32 | 0.38 | 1.17 |
| Norway      | 1.77 | 1.76 | 2.10 | 0.93 | 2.31 | 2.31 | 2.57 | 1.22 | 0.95 | 0.93 | 0.95 | 0.50 | 0.98 | 0.95 | 0.99 | 0.51 | 1.32 | 1.29 | 1.33 | 0.70 |
| Switzerland | 1.60 | 1.58 | 1.74 | 3.20 | 1.66 | 1.64 | 1.74 | 3.31 | 0.40 | 0.39 | 0.47 | 0.80 | 0.23 | 0.22 | 0.32 | 0.46 | 0.22 | 0.21 | 0.24 | 0.43 |

Table S4. The accuracy measures for the 4 points ahead predictions the volume index of production in construction

|          | Abbasov-Mametova |      |      |      | NFTS |      |      |      | SES  |      |      |      | Holt |      |      |      | ARIMA |      |      |      |
|----------|------------------|------|------|------|------|------|------|------|------|------|------|------|------|------|------|------|-------|------|------|------|
| Country  | MAE              | MAPE | RMSE | MASE | MAE  | MAPE | RMSE | MASE | MAE  | MAPE | RMSE | MASE | MAE  | MAPE | RMSE | MASE | MAE   | MAPE | RMSE | MASE |
| Belgium  | 1.32             | 1.30 | 1.60 | 0.72 | 1.15 | 1.13 | 1.37 | 0.62 | 0.92 | 0.92 | 0.93 | 0.50 | 0.87 | 0.87 | 1.09 | 0.47 | 0.86  | 0.86 | 0.97 | 0.47 |
| Bulgaria | 2.63             | 2.81 | 2.83 | 7.17 | 2.41 | 2.59 | 2.49 | 6.58 | 0.95 | 1.04 | 0.97 | 2.59 | 0.56 | 0.62 | 0.62 | 1.53 | 0.95  | 1.04 | 0.97 | 2.59 |
| Czechia  | 1.43             | 1.27 | 1.55 | 1.19 | 1.81 | 1.61 | 1.89 | 1.51 | 1.34 | 1.22 | 1.47 | 1.11 | 0.68 | 0.61 | 0.78 | 0.57 | 1.33  | 1.21 | 1.45 | 1.10 |
| Denmark  | 8.80             | 8.41 | 9.89 | 4.13 | 4.34 | 3.93 | 5.03 | 2.03 | 1.43 | 1.24 | 1.69 | 0.67 | 1.65 | 1.41 | 2.16 | 0.77 | 1.56  | 1.36 | 1.84 | 0.73 |
| Germany  | 2.10             | 1.83 | 2.55 | 0.68 | 2.72 | 2.40 | 3.45 | 0.88 | 3.26 | 2.90 | 4.28 | 1.05 | 2.59 | 2.28 | 3.35 | 0.84 | 4.00  | 3.58 | 4.87 | 1.29 |
| Spain    | 3.73             | 3.68 | 4.04 | 1.72 | 3.57 | 3.53 | 3.90 | 1.65 | 6.86 | 6.57 | 7.06 | 3.17 | 6.14 | 5.92 | 6.31 | 2.83 | 6.86  | 6.57 | 7.06 | 3.17 |
| France   | 3.10             | 3.13 | 3.55 | 1.21 | 3.89 | 3.96 | 4.26 | 1.51 | 1.71 | 1.67 | 1.96 | 0.67 | 2.04 | 1.98 | 2.26 | 0.80 | 1.71  | 1.67 | 1.96 | 0.67 |
| Croatia  | 3.18             | 2.55 | 3.67 | 1.29 | 2.39 | 1.90 | 3.01 | 0.97 | 5.68 | 4.67 | 6.30 | 2.30 | 4.55 | 3.69 | 5.01 | 1.84 | 4.53  | 3.68 | 4.99 | 1.84 |
| Italy    | 2.48             | 2.30 | 3.13 | 0.57 | 2.80 | 2.59 | 3.37 | 0.64 | 3.71 | 3.52 | 4.24 | 0.85 | 2.98 | 2.80 | 3.58 | 0.68 | 3.33  | 3.13 | 3.93 | 0.76 |

|             |       |       |       |      |       |       |       |      |       |       |       |      |       |      |       |      |       |       |       |      |
|-------------|-------|-------|-------|------|-------|-------|-------|------|-------|-------|-------|------|-------|------|-------|------|-------|-------|-------|------|
| Luxembourg  | 12.50 | 12.50 | 15.44 | 1.34 | 6.06  | 5.46  | 7.90  | 0.65 | 5.76  | 5.25  | 8.25  | 0.62 | 4.34  | 3.87 | 6.70  | 0.47 | 5.44  | 4.94  | 7.93  | 0.58 |
| Hungary     | 12.07 | 7.52  | 12.23 | 1.62 | 11.75 | 7.34  | 11.87 | 1.57 | 12.14 | 7.47  | 12.93 | 1.63 | 15.11 | 9.04 | 16.58 | 2.02 | 16.34 | 9.70  | 17.69 | 2.19 |
| Netherlands | 1.70  | 1.31  | 1.92  | 0.65 | 1.72  | 1.32  | 1.97  | 0.65 | 2.45  | 1.90  | 2.63  | 0.93 | 2.41  | 1.83 | 3.05  | 0.92 | 2.32  | 1.77  | 2.86  | 0.88 |
| Austria     | 1.53  | 1.18  | 1.69  | 1.91 | 2.74  | 2.11  | 2.83  | 3.43 | 2.57  | 2.06  | 2.70  | 3.21 | 0.44  | 0.35 | 0.53  | 0.55 | 1.13  | 0.90  | 1.19  | 1.42 |
| Poland      | 4.53  | 3.73  | 4.88  | 0.77 | 4.17  | 3.42  | 4.52  | 0.71 | 5.44  | 4.55  | 6.32  | 0.92 | 4.57  | 3.71 | 5.04  | 0.78 | 3.27  | 2.61  | 4.34  | 0.55 |
| Portugal    | 0.68  | 0.65  | 0.87  | 0.62 | 0.65  | 0.62  | 0.84  | 0.59 | 0.70  | 0.67  | 0.95  | 0.64 | 1.09  | 1.04 | 1.30  | 0.99 | 0.70  | 0.67  | 0.95  | 0.64 |
| Romania     | 7.52  | 6.30  | 9.68  | 0.71 | 8.54  | 7.25  | 10.92 | 0.81 | 11.60 | 10.45 | 15.83 | 1.09 | 10.80 | 9.57 | 14.53 | 1.02 | 11.60 | 10.45 | 15.83 | 1.09 |
| Slovenia    | 12.49 | 10.27 | 15.50 | 2.07 | 14.65 | 12.44 | 18.17 | 2.43 | 7.87  | 6.12  | 9.59  | 1.31 | 10.71 | 8.57 | 12.94 | 1.78 | 6.80  | 5.20  | 8.28  | 1.13 |
| Slovakia    | 4.70  | 4.75  | 5.66  | 1.78 | 4.40  | 4.46  | 5.31  | 1.67 | 5.44  | 5.41  | 6.40  | 2.07 | 6.28  | 6.20 | 6.97  | 2.38 | 4.37  | 4.40  | 5.48  | 1.66 |
| Finland     | 3.10  | 2.77  | 3.62  | 5.17 | 2.22  | 1.96  | 2.61  | 3.70 | 1.16  | 1.01  | 1.39  | 1.94 | 0.60  | 0.52 | 0.62  | 1.00 | 1.14  | 1.00  | 1.38  | 1.91 |
| Sweden      | 4.53  | 3.53  | 4.79  | 3.77 | 5.68  | 4.40  | 5.87  | 4.73 | 0.62  | 0.50  | 0.75  | 0.52 | 2.51  | 2.08 | 2.65  | 2.09 | 2.46  | 1.96  | 2.64  | 2.05 |

Table S5. The accuracy measures for the 4 points ahead predictions of the volume index of production in industry for electricity, gas, steam and air conditioning supply

|            | Abbasov-Mametova |       |       |      | NFTS  |       |       |      | SES   |       |       |      | Holt  |       |       |      | ARIMA |       |       |      |
|------------|------------------|-------|-------|------|-------|-------|-------|------|-------|-------|-------|------|-------|-------|-------|------|-------|-------|-------|------|
| Country    | MAE              | MAPE  | RMSE  | MASE | MAE   | MAPE  | RMSE  | MASE | MAE   | MAPE  | RMSE  | MASE | MAE   | MAPE  | RMSE  | MASE | MAE   | MAPE  | RMSE  | MASE |
| Belgium    | 20.43            | 13.32 | 22.08 | 3.40 | 21.25 | 13.79 | 22.86 | 3.54 | 15.37 | 10.44 | 16.42 | 2.56 | 17.87 | 11.91 | 19.05 | 2.98 | 6.86  | 4.98  | 7.72  | 1.14 |
| Bulgaria   | 0.93             | 1.24  | 1.06  | 1.63 | 1.62  | 2.19  | 1.70  | 2.86 | 1.15  | 1.49  | 1.23  | 2.02 | 1.44  | 1.85  | 1.51  | 2.53 | 1.19  | 1.60  | 1.33  | 2.09 |
| Czechia    | 1.92             | 1.82  | 2.16  | 0.84 | 1.90  | 1.80  | 2.21  | 0.82 | 2.63  | 2.46  | 3.66  | 1.14 | 3.34  | 3.11  | 4.35  | 1.45 | 2.63  | 2.46  | 3.66  | 1.14 |
| Denmark    | 23.00            | 29.01 | 24.55 | 4.66 | 27.96 | 37.42 | 29.19 | 5.67 | 4.28  | 4.18  | 4.53  | 0.87 | 7.05  | 7.25  | 8.18  | 1.43 | 4.28  | 4.18  | 4.53  | 0.87 |
| Germany    | 2.20             | 2.45  | 2.25  | 3.30 | 2.66  | 2.98  | 2.70  | 4.00 | 1.62  | 1.80  | 1.74  | 2.43 | 2.67  | 2.99  | 2.71  | 4.00 | 0.95  | 1.04  | 1.14  | 1.43 |
| Estonia    | 5.61             | 7.89  | 6.20  | 0.75 | 6.96  | 10.17 | 8.08  | 0.94 | 6.83  | 9.00  | 7.57  | 0.92 | 5.31  | 7.30  | 6.01  | 0.71 | 6.83  | 9.00  | 7.57  | 0.92 |
| Ireland    | 4.54             | 3.51  | 5.65  | 1.12 | 1.72  | 1.37  | 2.95  | 0.42 | 3.41  | 2.84  | 4.43  | 0.84 | 2.88  | 2.38  | 3.58  | 0.71 | 5.42  | 4.60  | 6.18  | 1.33 |
| Greece     | 8.30             | 9.01  | 8.80  | 1.01 | 8.05  | 8.90  | 8.91  | 0.98 | 13.25 | 12.36 | 14.71 | 1.61 | 8.34  | 8.29  | 9.28  | 1.01 | 12.92 | 12.11 | 14.25 | 1.57 |
| Spain      | 4.33             | 4.87  | 4.55  | 1.32 | 5.13  | 5.84  | 5.40  | 1.57 | 4.99  | 5.15  | 5.68  | 1.53 | 4.57  | 4.76  | 5.09  | 1.40 | 5.97  | 6.10  | 6.66  | 1.83 |
| France     | 5.48             | 5.28  | 6.26  | 2.08 | 4.06  | 4.00  | 4.58  | 1.54 | 2.91  | 2.90  | 3.46  | 1.10 | 2.82  | 2.81  | 3.39  | 1.07 | 2.95  | 2.94  | 3.50  | 1.12 |
| Croatia    | 2.15             | 1.84  | 2.38  | 0.69 | 2.69  | 2.30  | 2.88  | 0.87 | 4.67  | 3.93  | 4.95  | 1.51 | 4.39  | 3.72  | 4.54  | 1.42 | 6.45  | 5.29  | 7.34  | 2.08 |
| Italy      | 3.05             | 2.99  | 3.40  | 1.48 | 2.95  | 2.90  | 3.31  | 1.43 | 4.71  | 4.55  | 4.97  | 2.28 | 4.36  | 4.22  | 4.62  | 2.11 | 4.71  | 4.54  | 4.96  | 2.28 |
| Cyprus     | 3.90             | 3.41  | 4.13  | 0.91 | 4.29  | 3.74  | 4.53  | 1.00 | 4.03  | 3.59  | 4.77  | 0.94 | 3.99  | 3.55  | 4.72  | 0.94 | 4.07  | 3.66  | 4.97  | 0.95 |
| Latvia     | 14.10            | 12.15 | 15.08 | 2.26 | 14.95 | 12.80 | 15.88 | 2.40 | 15.66 | 13.36 | 16.31 | 2.51 | 15.81 | 13.47 | 16.46 | 2.54 | 9.35  | 8.40  | 10.65 | 1.50 |
| Lithuania  | 3.58             | 3.57  | 4.48  | 0.52 | 3.45  | 3.42  | 4.52  | 0.51 | 2.85  | 2.77  | 4.92  | 0.42 | 3.62  | 3.48  | 5.64  | 0.53 | 2.85  | 2.77  | 4.90  | 0.42 |
| Luxembourg | 2.55             | 2.94  | 3.38  | 0.94 | 2.47  | 2.86  | 3.29  | 0.92 | 2.69  | 3.14  | 3.01  | 1.00 | 3.07  | 3.66  | 3.29  | 1.14 | 3.09  | 3.68  | 3.31  | 1.14 |
| Hungary    | 5.67             | 6.16  | 6.46  | 2.84 | 4.96  | 5.33  | 5.65  | 2.48 | 1.24  | 1.25  | 1.73  | 0.62 | 3.28  | 3.22  | 3.63  | 1.64 | 1.28  | 1.29  | 1.68  | 0.64 |

|             |       |       |       |      |       |       |       |      |       |       |       |      |       |       |       |      |       |       |       |      |
|-------------|-------|-------|-------|------|-------|-------|-------|------|-------|-------|-------|------|-------|-------|-------|------|-------|-------|-------|------|
| Malta       | 31.35 | 20.85 | 38.49 | 1.29 | 32.09 | 21.56 | 39.57 | 1.32 | 29.49 | 19.31 | 36.48 | 1.21 | 22.95 | 14.05 | 28.42 | 0.94 | 29.24 | 19.26 | 37.05 | 1.20 |
| Netherlands | 4.03  | 3.12  | 5.39  | 0.95 | 4.75  | 3.64  | 6.25  | 1.12 | 5.25  | 4.14  | 5.37  | 1.24 | 4.23  | 3.27  | 5.69  | 1.00 | 5.25  | 4.13  | 5.38  | 1.24 |
| Austria     | 4.00  | 3.39  | 4.21  | 1.30 | 4.34  | 3.69  | 4.56  | 1.42 | 5.81  | 5.00  | 6.16  | 1.90 | 5.07  | 4.34  | 5.40  | 1.65 | 6.88  | 5.97  | 7.17  | 2.24 |
| Poland      | 4.43  | 3.88  | 4.68  | 1.07 | 4.60  | 4.02  | 4.77  | 1.11 | 3.08  | 2.76  | 4.40  | 0.75 | 5.68  | 4.89  | 5.75  | 1.37 | 3.73  | 3.29  | 4.26  | 0.90 |
| Portugal    | 13.99 | 10.04 | 20.48 | 1.21 | 12.54 | 9.02  | 19.40 | 1.08 | 12.31 | 10.83 | 12.70 | 1.06 | 12.43 | 10.98 | 12.88 | 1.07 | 10.21 | 8.63  | 10.89 | 0.88 |
| Romania     | 2.68  | 2.88  | 3.05  | 1.82 | 3.13  | 3.39  | 3.47  | 2.13 | 1.09  | 1.13  | 1.52  | 0.74 | 0.97  | 1.01  | 1.46  | 0.66 | 2.60  | 2.64  | 2.64  | 1.77 |
| Slovenia    | 11.18 | 10.56 | 13.66 | 4.36 | 5.68  | 5.76  | 7.45  | 2.21 | 8.13  | 8.16  | 8.72  | 3.17 | 8.46  | 8.47  | 9.04  | 3.30 | 8.13  | 8.16  | 8.72  | 3.17 |
| Slovakia    | 2.50  | 2.29  | 3.10  | 1.39 | 2.61  | 2.39  | 3.22  | 1.45 | 2.25  | 2.05  | 2.73  | 1.25 | 2.36  | 2.16  | 2.93  | 1.31 | 2.58  | 2.36  | 3.18  | 1.43 |
| Finland     | 2.97  | 3.20  | 3.59  | 1.05 | 2.45  | 2.61  | 3.07  | 0.86 | 1.28  | 1.32  | 1.53  | 0.45 | 1.29  | 1.33  | 1.53  | 0.46 | 2.18  | 2.21  | 2.49  | 0.77 |
| Sweden      | 3.17  | 2.95  | 3.32  | 3.97 | 3.27  | 3.04  | 3.41  | 4.09 | 0.79  | 0.76  | 0.88  | 0.99 | 0.78  | 0.76  | 1.21  | 0.98 | 2.28  | 2.24  | 2.32  | 2.85 |
| Norway      | 3.93  | 4.19  | 4.46  | 0.72 | 3.93  | 4.19  | 4.41  | 0.72 | 3.93  | 4.15  | 4.84  | 0.72 | 3.93  | 4.18  | 4.60  | 0.72 | 3.93  | 4.18  | 4.56  | 0.72 |
| Switzerland | 7.17  | 7.70  | 9.21  | 1.51 | 2.86  | 2.76  | 3.04  | 0.60 | 3.30  | 3.06  | 3.60  | 0.70 | 3.58  | 3.32  | 3.85  | 0.76 | 8.32  | 7.28  | 8.62  | 1.76 |

Table S6. The accuracy measures for the 4 points ahead predictions of the index of deflated turnover in retail trade, except of motor vehicles and motorcycles

|            | Abbasov-Mametova |      |      |      | NFTS |      |      |      | SES  |      |      |      | Holt |      |      |      | ARIMA |      |      |      |
|------------|------------------|------|------|------|------|------|------|------|------|------|------|------|------|------|------|------|-------|------|------|------|
| Country    | MAE              | MAPE | RMSE | MASE | MAE  | MAPE | RMSE | MASE | MAE  | MAPE | RMSE | MASE | MAE  | MAPE | RMSE | MASE | MAE   | MAPE | RMSE | MASE |
| Belgium    | 1.15             | 1.13 | 1.35 | 1.28 | 1.14 | 1.12 | 1.36 | 1.27 | 1.13 | 1.13 | 1.22 | 1.26 | 1.09 | 1.08 | 1.18 | 1.21 | 1.06  | 1.05 | 1.15 | 1.18 |
| Bulgaria   | 2.80             | 2.31 | 3.93 | 0.57 | 2.60 | 2.14 | 3.79 | 0.53 | 3.30 | 2.73 | 4.28 | 0.67 | 3.58 | 2.97 | 4.51 | 0.73 | 2.34  | 1.92 | 3.65 | 0.48 |
| Czechia    | 0.45             | 0.36 | 0.49 | 0.59 | 0.45 | 0.36 | 0.56 | 0.59 | 1.41 | 1.14 | 1.63 | 1.84 | 0.51 | 0.41 | 0.70 | 0.66 | 0.51  | 0.41 | 0.56 | 0.66 |
| Denmark    | 0.67             | 0.64 | 0.73 | 0.49 | 0.67 | 0.64 | 0.78 | 0.49 | 0.63 | 0.60 | 0.72 | 0.46 | 0.84 | 0.80 | 1.08 | 0.61 | 0.68  | 0.65 | 0.80 | 0.50 |
| Germany    | 0.87             | 0.79 | 1.00 | 0.94 | 0.85 | 0.76 | 0.96 | 0.91 | 0.90 | 0.81 | 1.03 | 0.97 | 0.49 | 0.43 | 0.57 | 0.52 | 0.51  | 0.45 | 0.61 | 0.54 |
| Estonia    | 3.18             | 2.88 | 3.83 | 2.51 | 3.03 | 2.73 | 3.55 | 2.39 | 1.62 | 1.45 | 2.15 | 1.28 | 1.22 | 1.08 | 1.55 | 0.97 | 1.20  | 1.06 | 1.52 | 0.95 |
| Ireland    | 1.38             | 1.13 | 1.63 | 0.65 | 1.30 | 1.07 | 1.56 | 0.62 | 1.53 | 1.27 | 1.91 | 0.73 | 1.77 | 1.43 | 2.18 | 0.84 | 1.34  | 1.10 | 1.63 | 0.64 |
| Greece     | 1.68             | 1.62 | 1.93 | 0.56 | 1.67 | 1.61 | 1.91 | 0.56 | 1.64 | 1.59 | 1.92 | 0.55 | 1.52 | 1.47 | 1.76 | 0.51 | 1.76  | 1.69 | 2.00 | 0.59 |
| Spain      | 1.25             | 1.16 | 1.35 | 0.83 | 1.32 | 1.22 | 1.45 | 0.88 | 0.88 | 0.81 | 0.99 | 0.58 | 0.80 | 0.74 | 1.00 | 0.53 | 0.76  | 0.70 | 0.92 | 0.51 |
| France     | 0.40             | 0.35 | 0.49 | 0.57 | 0.45 | 0.40 | 0.51 | 0.64 | 0.56 | 0.49 | 0.62 | 0.80 | 0.73 | 0.64 | 0.78 | 1.04 | 0.74  | 0.65 | 0.92 | 1.06 |
| Croatia    | 2.45             | 2.15 | 2.59 | 3.87 | 2.73 | 2.40 | 2.85 | 4.30 | 1.52 | 1.33 | 1.64 | 2.40 | 0.81 | 0.69 | 0.93 | 1.28 | 1.52  | 1.32 | 1.63 | 2.39 |
| Cyprus     | 1.90             | 1.50 | 2.17 | 5.18 | 1.51 | 1.20 | 1.70 | 4.13 | 1.07 | 0.86 | 1.11 | 2.91 | 1.54 | 1.22 | 1.75 | 4.21 | 0.81  | 0.65 | 0.85 | 2.22 |
| Latvia     | 5.43             | 4.91 | 5.95 | 3.26 | 5.72 | 5.19 | 6.21 | 3.43 | 4.25 | 3.79 | 4.70 | 2.55 | 4.13 | 3.68 | 4.62 | 2.48 | 3.78  | 3.36 | 4.20 | 2.27 |
| Lithuania  | 2.57             | 2.05 | 2.85 | 2.09 | 2.43 | 1.93 | 2.72 | 1.97 | 2.96 | 2.36 | 3.27 | 2.40 | 0.87 | 0.68 | 1.23 | 0.70 | 1.45  | 1.14 | 1.73 | 1.18 |
| Luxembourg | 0.35             | 1.05 | 0.39 | 0.87 | 0.38 | 1.15 | 0.44 | 0.96 | 0.53 | 1.64 | 0.61 | 1.33 | 0.26 | 0.79 | 0.26 | 0.64 | 0.30  | 0.93 | 0.34 | 0.76 |
| Hungary    | 0.95             | 0.73 | 1.40 | 0.75 | 0.75 | 0.58 | 1.22 | 0.59 | 1.70 | 1.33 | 2.14 | 1.34 | 0.78 | 0.60 | 1.02 | 0.62 | 0.63  | 0.48 | 0.78 | 0.49 |
| Malta      | 2.22             | 1.83 | 2.64 | 0.95 | 2.11 | 1.73 | 2.55 | 0.90 | 1.67 | 1.40 | 2.04 | 0.72 | 2.31 | 1.90 | 2.51 | 0.99 | 2.02  | 1.67 | 2.18 | 0.87 |

|             |      |      |      |      |      |      |      |      |      |      |      |      |      |      |      |      |      |      |      |      |
|-------------|------|------|------|------|------|------|------|------|------|------|------|------|------|------|------|------|------|------|------|------|
| Netherlands | 0.60 | 0.54 | 0.67 | 0.43 | 0.60 | 0.54 | 0.68 | 0.43 | 1.00 | 0.91 | 1.28 | 0.71 | 0.65 | 0.58 | 0.70 | 0.46 | 1.01 | 0.92 | 1.16 | 0.72 |
| Austria     | 1.15 | 1.11 | 1.47 | 1.23 | 1.24 | 1.20 | 1.55 | 1.33 | 1.11 | 1.07 | 1.41 | 1.19 | 0.70 | 0.67 | 0.89 | 0.75 | 0.71 | 0.68 | 1.06 | 0.76 |
| Poland      | 4.20 | 3.33 | 4.65 | 1.80 | 3.80 | 3.00 | 4.24 | 1.63 | 3.71 | 2.93 | 4.08 | 1.59 | 2.43 | 1.90 | 2.80 | 1.04 | 2.58 | 2.01 | 2.94 | 1.10 |
| Portugal    | 2.33 | 1.96 | 3.06 | 0.81 | 2.11 | 1.78 | 2.80 | 0.74 | 3.92 | 3.37 | 4.73 | 1.37 | 2.33 | 1.97 | 3.08 | 0.81 | 3.19 | 2.72 | 3.95 | 1.11 |
| Romania     | 3.56 | 2.45 | 4.28 | 1.34 | 3.22 | 2.21 | 4.01 | 1.21 | 4.63 | 3.21 | 5.38 | 1.73 | 2.85 | 1.95 | 3.51 | 1.07 | 2.59 | 1.76 | 3.28 | 0.97 |
| Slovenia    | 7.71 | 5.94 | 8.57 | 3.73 | 6.60 | 5.16 | 7.09 | 3.19 | 1.45 | 1.19 | 1.77 | 0.70 | 2.07 | 1.69 | 2.47 | 1.00 | 1.65 | 1.35 | 2.01 | 0.80 |
| Slovakia    | 3.03 | 2.74 | 3.41 | 2.67 | 3.09 | 2.79 | 3.45 | 2.72 | 2.80 | 2.53 | 3.10 | 2.47 | 2.35 | 2.11 | 2.62 | 2.08 | 2.40 | 2.16 | 2.73 | 2.12 |
| Finland     | 1.60 | 1.47 | 1.97 | 1.78 | 1.50 | 1.38 | 1.88 | 1.67 | 0.75 | 0.68 | 1.00 | 0.83 | 0.58 | 0.53 | 0.77 | 0.65 | 0.79 | 0.71 | 0.85 | 0.88 |
| Sweden      | 0.50 | 0.46 | 0.54 | 0.83 | 0.43 | 0.39 | 0.54 | 0.71 | 0.77 | 0.72 | 0.79 | 1.29 | 0.38 | 0.35 | 0.64 | 0.64 | 0.80 | 0.74 | 0.82 | 1.33 |
| Norway      | 1.15 | 1.13 | 1.48 | 0.82 | 1.29 | 1.28 | 1.69 | 0.92 | 0.97 | 0.95 | 1.03 | 0.70 | 0.97 | 0.95 | 1.14 | 0.70 | 0.97 | 0.95 | 1.03 | 0.70 |
| Switzerland | 2.48 | 2.48 | 2.67 | 5.73 | 2.00 | 1.99 | 2.11 | 4.62 | 0.73 | 0.71 | 0.79 | 1.68 | 0.54 | 0.52 | 0.62 | 1.23 | 0.55 | 0.54 | 0.69 | 1.28 |

Table S7. The accuracy measures for the 6 points ahead predictions the volume index of production in construction

|             | Abbasov-Mametova |       |       |      | NFTS  |       |       |      | SES  |      |       |      | Holt  |      |       |      | ARIMA |      |       |      |
|-------------|------------------|-------|-------|------|-------|-------|-------|------|------|------|-------|------|-------|------|-------|------|-------|------|-------|------|
| Country     | MAE              | MAPE  | RMSE  | MASE | MAE   | MAPE  | RMSE  | MASE | MAE  | MAPE | RMSE  | MASE | MAE   | MAPE | RMSE  | MASE | MAE   | MAPE | RMSE  | MASE |
| Belgium     | 1.65             | 1.60  | 2.13  | 1.07 | 1.20  | 1.18  | 1.63  | 0.78 | 1.88 | 1.83 | 2.04  | 1.22 | 3.41  | 3.28 | 3.50  | 2.21 | 0.82  | 0.81 | 0.87  | 0.53 |
| Bulgaria    | 3.87             | 4.02  | 4.65  | 8.80 | 4.08  | 4.27  | 4.47  | 9.28 | 0.85 | 0.93 | 0.97  | 1.93 | 2.95  | 3.13 | 3.26  | 6.71 | 0.85  | 0.93 | 0.97  | 1.93 |
| Czechia     | 1.70             | 1.50  | 2.00  | 2.02 | 1.37  | 1.22  | 1.61  | 1.63 | 1.35 | 1.24 | 1.66  | 1.61 | 3.79  | 3.32 | 3.83  | 4.51 | 1.80  | 1.66 | 2.04  | 2.14 |
| Denmark     | 12.53            | 12.57 | 14.04 | 7.93 | 6.55  | 6.11  | 7.48  | 4.15 | 1.18 | 1.03 | 1.56  | 0.75 | 1.77  | 1.51 | 2.13  | 1.12 | 1.30  | 1.14 | 1.67  | 0.82 |
| Germany     | 1.97             | 1.69  | 2.35  | 0.75 | 1.70  | 1.48  | 2.04  | 0.65 | 2.35 | 2.09 | 3.31  | 0.90 | 2.02  | 1.77 | 2.53  | 0.77 | 2.43  | 2.16 | 3.45  | 0.93 |
| Spain       | 2.62             | 2.60  | 3.21  | 1.38 | 2.52  | 2.50  | 3.08  | 1.33 | 5.96 | 5.69 | 6.33  | 3.14 | 6.46  | 6.14 | 6.81  | 3.40 | 5.96  | 5.70 | 6.33  | 3.14 |
| France      | 4.23             | 4.34  | 4.61  | 1.44 | 5.02  | 5.18  | 5.34  | 1.71 | 1.64 | 1.59 | 1.85  | 0.56 | 1.93  | 1.87 | 2.26  | 0.66 | 1.64  | 1.59 | 1.85  | 0.56 |
| Croatia     | 3.03             | 2.46  | 3.69  | 1.53 | 2.37  | 1.90  | 3.17  | 1.19 | 6.48 | 5.45 | 7.33  | 3.27 | 4.13  | 3.39 | 4.85  | 2.09 | 4.09  | 3.36 | 4.81  | 2.07 |
| Italy       | 2.03             | 1.88  | 2.68  | 0.53 | 2.06  | 1.91  | 2.74  | 0.54 | 2.81 | 2.67 | 3.55  | 0.74 | 2.29  | 2.14 | 3.02  | 0.60 | 2.92  | 2.78 | 3.69  | 0.77 |
| Luxembourg  | 19.64            | 21.79 | 22.71 | 2.60 | 11.70 | 11.66 | 14.18 | 1.55 | 5.80 | 5.34 | 7.81  | 0.77 | 6.14  | 5.68 | 8.21  | 0.81 | 6.14  | 5.66 | 7.96  | 0.81 |
| Hungary     | 7.75             | 5.28  | 11.29 | 0.91 | 8.84  | 6.06  | 12.09 | 1.04 | 7.45 | 4.82 | 7.97  | 0.87 | 10.24 | 6.16 | 13.15 | 1.20 | 7.45  | 4.86 | 8.22  | 0.87 |
| Netherlands | 3.53             | 2.65  | 4.09  | 1.48 | 4.14  | 3.09  | 4.74  | 1.74 | 2.28 | 1.78 | 2.69  | 0.96 | 2.26  | 1.73 | 2.70  | 0.95 | 2.15  | 1.66 | 2.43  | 0.90 |
| Austria     | 0.88             | 0.70  | 0.98  | 0.66 | 0.89  | 0.71  | 1.05  | 0.67 | 3.40 | 2.77 | 3.69  | 2.54 | 1.08  | 0.86 | 1.54  | 0.81 | 0.97  | 0.77 | 1.27  | 0.72 |
| Poland      | 11.92            | 8.77  | 12.94 | 2.04 | 10.88 | 8.10  | 11.74 | 1.86 | 4.23 | 3.36 | 5.43  | 0.72 | 4.10  | 3.29 | 4.73  | 0.70 | 7.62  | 5.82 | 8.76  | 1.31 |
| Portugal    | 1.13             | 1.08  | 1.28  | 1.53 | 1.06  | 1.02  | 1.22  | 1.44 | 1.27 | 1.21 | 1.41  | 1.71 | 2.03  | 1.92 | 2.19  | 2.74 | 1.27  | 1.21 | 1.41  | 1.71 |
| Romania     | 9.61             | 7.59  | 10.95 | 1.35 | 10.73 | 8.40  | 12.13 | 1.50 | 8.57 | 7.36 | 10.49 | 1.20 | 8.48  | 7.16 | 9.54  | 1.19 | 8.57  | 7.36 | 10.49 | 1.20 |
| Slovenia    | 23.54            | 23.35 | 29.18 | 3.88 | 25.34 | 25.02 | 29.79 | 4.18 | 6.33 | 4.91 | 7.97  | 1.05 | 8.49  | 6.35 | 9.57  | 1.40 | 7.84  | 5.64 | 9.24  | 1.29 |

|          |      |      |      |      |      |      |      |      |      |      |      |      |      |      |      |      |      |      |      |      |
|----------|------|------|------|------|------|------|------|------|------|------|------|------|------|------|------|------|------|------|------|------|
| Slovakia | 5.31 | 5.74 | 6.27 | 1.38 | 5.16 | 5.54 | 5.88 | 1.34 | 4.05 | 4.19 | 4.43 | 1.05 | 3.92 | 4.02 | 4.47 | 1.02 | 4.05 | 4.19 | 4.43 | 1.05 |
| Finland  | 4.62 | 4.20 | 5.21 | 9.23 | 3.58 | 3.22 | 4.05 | 7.16 | 1.32 | 1.16 | 1.52 | 2.64 | 0.50 | 0.43 | 0.77 | 1.00 | 1.32 | 1.16 | 1.52 | 2.64 |
| Sweden   | 4.24 | 3.31 | 4.75 | 2.21 | 3.98 | 3.12 | 4.42 | 2.07 | 1.08 | 0.88 | 1.33 | 0.56 | 2.64 | 2.19 | 2.82 | 1.38 | 1.03 | 0.84 | 1.28 | 0.54 |

Table S8. The accuracy measures for the 6 points ahead predictions of the volume index of production in industry for electricity, gas, steam and air conditioning supply

|             | Abbasov-Mametova |       |       |      | NFTS  |       |       |      | SES   |       |       |      | Holt  |       |       |      | ARIMA |       |       |      |
|-------------|------------------|-------|-------|------|-------|-------|-------|------|-------|-------|-------|------|-------|-------|-------|------|-------|-------|-------|------|
| Country     | MAE              | MAPE  | RMSE  | MASE | MAE   | MAPE  | RMSE  | MASE | MAE   | MAPE  | RMSE  | MASE | MAE   | MAPE  | RMSE  | MASE | MAE   | MAPE  | RMSE  | MASE |
| Belgium     | 26.87            | 16.04 | 30.85 | 3.57 | 33.70 | 19.16 | 38.27 | 4.48 | 14.79 | 9.82  | 16.53 | 1.97 | 17.83 | 11.52 | 20.04 | 2.37 | 5.72  | 4.08  | 7.12  | 0.76 |
| Bulgaria    | 2.71             | 3.42  | 2.87  | 2.56 | 2.12  | 2.69  | 2.32  | 2.00 | 5.12  | 6.27  | 5.36  | 4.83 | 2.38  | 3.02  | 2.58  | 2.24 | 2.18  | 2.77  | 2.39  | 2.06 |
| Czechia     | 6.50             | 6.49  | 6.60  | 2.64 | 6.00  | 5.94  | 6.13  | 2.44 | 3.58  | 3.37  | 4.25  | 1.46 | 3.45  | 3.23  | 4.22  | 1.40 | 3.58  | 3.37  | 4.25  | 1.46 |
| Denmark     | 23.41            | 31.19 | 26.11 | 3.60 | 26.87 | 37.20 | 29.15 | 4.13 | 4.92  | 4.79  | 5.58  | 0.76 | 7.15  | 7.38  | 8.08  | 1.10 | 4.92  | 4.79  | 5.58  | 0.76 |
| Germany     | 4.37             | 5.04  | 4.72  | 3.70 | 4.93  | 5.72  | 5.25  | 4.18 | 2.18  | 2.45  | 2.46  | 1.85 | 3.47  | 3.96  | 3.81  | 2.94 | 2.62  | 2.95  | 2.87  | 2.22 |
| Estonia     | 15.75            | 27.04 | 16.45 | 2.63 | 18.65 | 33.71 | 19.24 | 3.11 | 8.20  | 12.26 | 9.59  | 1.37 | 13.96 | 23.11 | 14.74 | 2.33 | 8.20  | 12.26 | 9.59  | 1.37 |
| Ireland     | 9.61             | 7.24  | 10.41 | 2.49 | 5.55  | 4.38  | 5.95  | 1.44 | 3.44  | 2.81  | 4.29  | 0.89 | 4.22  | 3.40  | 4.87  | 1.09 | 5.73  | 4.52  | 6.32  | 1.48 |
| Greece      | 6.54             | 6.78  | 7.32  | 0.88 | 6.28  | 6.38  | 7.30  | 0.84 | 11.66 | 10.83 | 13.11 | 1.56 | 6.90  | 6.76  | 8.49  | 0.92 | 11.66 | 10.83 | 13.11 | 1.56 |
| Spain       | 2.18             | 2.38  | 2.60  | 0.62 | 1.29  | 1.37  | 1.87  | 0.37 | 4.75  | 4.84  | 5.82  | 1.35 | 3.56  | 3.70  | 4.30  | 1.01 | 4.92  | 5.00  | 5.92  | 1.40 |
| France      | 9.13             | 8.45  | 10.06 | 4.15 | 7.41  | 7.01  | 8.10  | 3.37 | 3.03  | 3.02  | 3.40  | 1.38 | 3.33  | 3.31  | 3.67  | 1.51 | 3.05  | 3.03  | 3.42  | 1.38 |
| Croatia     | 6.03             | 5.45  | 6.45  | 2.27 | 5.83  | 5.24  | 6.21  | 2.19 | 3.53  | 3.04  | 3.89  | 1.33 | 3.97  | 3.38  | 4.19  | 1.49 | 3.53  | 2.99  | 3.89  | 1.33 |
| Italy       | 3.78             | 3.65  | 4.25  | 2.59 | 3.68  | 3.55  | 4.16  | 2.52 | 3.62  | 3.49  | 4.18  | 2.48 | 6.39  | 5.99  | 6.94  | 4.38 | 3.62  | 3.49  | 4.18  | 2.48 |
| Cyprus      | 5.22             | 4.47  | 6.01  | 1.56 | 5.80  | 4.93  | 6.61  | 1.73 | 3.17  | 2.81  | 3.98  | 0.94 | 3.51  | 3.10  | 4.10  | 1.05 | 2.98  | 2.68  | 4.08  | 0.89 |
| Latvia      | 18.42            | 14.72 | 20.44 | 2.34 | 19.28 | 15.24 | 21.48 | 2.45 | 10.36 | 9.13  | 11.90 | 1.32 | 7.53  | 7.17  | 10.45 | 0.96 | 8.47  | 7.55  | 9.69  | 1.08 |
| Lithuania   | 8.96             | 9.71  | 9.82  | 1.59 | 10.36 | 11.37 | 11.09 | 1.84 | 2.91  | 2.84  | 4.45  | 0.52 | 2.90  | 2.80  | 4.68  | 0.52 | 2.91  | 2.84  | 4.45  | 0.52 |
| Luxembourg  | 1.90             | 2.18  | 2.95  | 0.77 | 1.77  | 2.04  | 2.82  | 0.72 | 1.78  | 2.06  | 2.50  | 0.72 | 2.10  | 2.48  | 2.50  | 0.85 | 1.78  | 2.08  | 2.43  | 0.72 |
| Hungary     | 11.65            | 14.05 | 13.60 | 6.33 | 10.02 | 11.59 | 11.22 | 5.44 | 0.84  | 0.84  | 1.41  | 0.46 | 4.23  | 4.10  | 4.46  | 2.30 | 1.05  | 1.05  | 1.53  | 0.57 |
| Malta       | 23.85            | 16.02 | 33.02 | 1.27 | 24.34 | 16.52 | 33.87 | 1.30 | 20.78 | 13.38 | 28.68 | 1.11 | 18.40 | 10.86 | 20.88 | 0.98 | 20.80 | 13.55 | 29.38 | 1.11 |
| Netherlands | 3.09             | 2.38  | 4.87  | 0.77 | 4.56  | 3.47  | 5.93  | 1.14 | 4.04  | 3.23  | 4.63  | 1.01 | 4.92  | 3.73  | 6.24  | 1.23 | 3.98  | 3.18  | 4.58  | 1.00 |
| Austria     | 4.51             | 3.59  | 5.14  | 1.12 | 4.40  | 3.52  | 5.03  | 1.09 | 2.32  | 1.91  | 3.17  | 0.58 | 2.95  | 2.39  | 3.92  | 0.73 | 2.30  | 1.90  | 3.04  | 0.57 |
| Poland      | 2.96             | 2.62  | 3.77  | 0.68 | 3.08  | 2.71  | 3.79  | 0.71 | 2.18  | 1.97  | 3.91  | 0.50 | 4.56  | 3.93  | 4.91  | 1.05 | 2.32  | 2.08  | 3.73  | 0.53 |
| Portugal    | 10.69            | 7.62  | 18.38 | 1.08 | 9.83  | 7.32  | 15.72 | 0.99 | 9.57  | 8.52  | 11.14 | 0.97 | 9.91  | 8.91  | 11.71 | 1.00 | 20.92 | 22.32 | 23.25 | 2.11 |
| Romania     | 1.43             | 1.49  | 1.68  | 0.82 | 1.59  | 1.66  | 1.67  | 0.92 | 7.98  | 7.68  | 8.12  | 4.58 | 6.37  | 6.23  | 6.55  | 3.66 | 7.68  | 7.40  | 7.95  | 4.41 |
| Slovenia    | 19.10            | 16.61 | 21.62 | 9.36 | 10.78 | 10.27 | 12.41 | 5.28 | 7.67  | 7.67  | 8.18  | 3.76 | 9.02  | 8.90  | 9.50  | 4.42 | 7.67  | 7.67  | 8.18  | 3.76 |
| Slovakia    | 2.78             | 2.59  | 3.67  | 1.72 | 2.99  | 2.78  | 3.83  | 1.84 | 2.23  | 2.06  | 3.04  | 1.38 | 2.51  | 2.33  | 3.35  | 1.55 | 2.14  | 1.97  | 2.94  | 1.32 |
| Finland     | 11.80            | 14.20 | 12.70 | 4.47 | 12.55 | 15.19 | 13.28 | 4.75 | 1.77  | 1.86  | 2.13  | 0.67 | 1.95  | 2.06  | 2.32  | 0.74 | 2.15  | 2.18  | 2.54  | 0.81 |

|             |      |      |      |      |      |      |      |      |      |      |      |      |      |      |      |      |      |      |      |      |
|-------------|------|------|------|------|------|------|------|------|------|------|------|------|------|------|------|------|------|------|------|------|
| Sweden      | 2.82 | 2.77 | 3.16 | 1.90 | 2.72 | 2.67 | 3.07 | 1.84 | 1.69 | 1.64 | 2.16 | 1.14 | 1.24 | 1.20 | 1.87 | 0.84 | 3.57 | 3.53 | 3.85 | 2.41 |
| Norway      | 3.25 | 3.45 | 4.05 | 0.77 | 3.25 | 3.45 | 4.02 | 0.77 | 3.27 | 3.45 | 4.30 | 0.77 | 3.24 | 3.44 | 4.04 | 0.77 | 3.27 | 3.45 | 4.22 | 0.77 |
| Switzerland | 6.86 | 6.93 | 8.73 | 1.73 | 7.01 | 6.06 | 7.62 | 1.77 | 3.88 | 3.71 | 4.66 | 0.98 | 3.64 | 3.42 | 4.06 | 0.92 | 5.37 | 4.79 | 6.11 | 1.36 |

Table S9. The accuracy measures for the 6 points ahead predictions of the index of deflated turnover in retail trade, except of motor vehicles and motorcycles

|             | Abbasov-Mametova |      |      |      | NFTS |      |      |      | SES  |      |      |      | Holt |      |      |      | ARIMA |      |      |      |
|-------------|------------------|------|------|------|------|------|------|------|------|------|------|------|------|------|------|------|-------|------|------|------|
| Country     | MAE              | MAPE | RMSE | MASE | MAE  | MAPE | RMSE | MASE | MAE  | MAPE | RMSE | MASE | MAE  | MAPE | RMSE | MASE | MAE   | MAPE | RMSE | MASE |
| Belgium     | 1.08             | 1.06 | 1.33 | 0.94 | 1.07 | 1.05 | 1.33 | 0.94 | 1.45 | 1.45 | 1.62 | 1.28 | 1.27 | 1.26 | 1.42 | 1.11 | 1.45  | 1.45 | 1.62 | 1.28 |
| Bulgaria    | 1.65             | 1.35 | 2.90 | 0.52 | 1.58 | 1.30 | 2.81 | 0.50 | 2.08 | 1.72 | 3.26 | 0.65 | 2.25 | 1.82 | 2.59 | 0.71 | 1.94  | 1.57 | 2.48 | 0.61 |
| Czechia     | 0.40             | 0.32 | 0.52 | 0.83 | 0.78 | 0.62 | 0.89 | 1.62 | 1.55 | 1.27 | 1.81 | 3.23 | 0.65 | 0.52 | 0.78 | 1.35 | 0.41  | 0.33 | 0.52 | 0.86 |
| Denmark     | 0.80             | 0.76 | 1.01 | 0.75 | 0.87 | 0.82 | 1.09 | 0.82 | 0.55 | 0.53 | 0.63 | 0.52 | 0.69 | 0.65 | 0.90 | 0.65 | 0.54  | 0.52 | 0.69 | 0.51 |
| Germany     | 0.59             | 0.53 | 0.70 | 0.66 | 0.57 | 0.52 | 0.67 | 0.64 | 0.74 | 0.66 | 0.95 | 0.82 | 0.43 | 0.39 | 0.50 | 0.48 | 0.66  | 0.59 | 0.77 | 0.73 |
| Estonia     | 3.78             | 3.47 | 4.50 | 4.40 | 3.01 | 2.74 | 3.67 | 3.50 | 1.99 | 1.78 | 2.40 | 2.31 | 1.11 | 0.99 | 1.51 | 1.30 | 1.55  | 1.39 | 2.05 | 1.80 |
| Ireland     | 1.47             | 1.20 | 1.74 | 1.04 | 1.71 | 1.39 | 2.00 | 1.20 | 1.12 | 0.92 | 1.27 | 0.79 | 1.88 | 1.52 | 2.26 | 1.33 | 1.73  | 1.40 | 2.09 | 1.22 |
| Greece      | 2.10             | 2.00 | 2.31 | 0.67 | 2.23 | 2.11 | 2.54 | 0.71 | 2.05 | 2.00 | 2.46 | 0.66 | 1.60 | 1.55 | 1.98 | 0.51 | 2.41  | 2.37 | 2.88 | 0.77 |
| Spain       | 0.95             | 0.88 | 1.17 | 0.73 | 0.98 | 0.91 | 1.19 | 0.75 | 0.68 | 0.63 | 0.83 | 0.52 | 0.68 | 0.62 | 0.88 | 0.52 | 0.76  | 0.70 | 0.98 | 0.59 |
| France      | 1.19             | 1.04 | 1.26 | 1.92 | 1.34 | 1.17 | 1.40 | 2.16 | 0.45 | 0.39 | 0.57 | 0.72 | 0.63 | 0.55 | 0.74 | 1.02 | 0.72  | 0.63 | 0.85 | 1.16 |
| Croatia     | 3.32             | 2.95 | 3.52 | 4.15 | 3.57 | 3.18 | 3.76 | 4.47 | 2.01 | 1.76 | 2.16 | 2.51 | 0.59 | 0.51 | 0.64 | 0.74 | 2.01  | 1.76 | 2.16 | 2.51 |
| Cyprus      | 2.65             | 2.07 | 3.13 | 4.27 | 4.01 | 3.11 | 4.35 | 6.47 | 1.66 | 1.36 | 1.74 | 2.68 | 0.65 | 0.52 | 0.83 | 1.04 | 0.61  | 0.49 | 0.77 | 0.98 |
| Latvia      | 3.76             | 3.40 | 4.87 | 2.19 | 3.88 | 3.51 | 4.99 | 2.25 | 2.62 | 2.32 | 3.27 | 1.52 | 1.92 | 1.67 | 2.55 | 1.12 | 1.61  | 1.40 | 2.22 | 0.94 |
| Lithuania   | 2.52             | 2.02 | 2.92 | 2.21 | 2.37 | 1.90 | 2.80 | 2.08 | 2.86 | 2.30 | 3.33 | 2.51 | 1.37 | 1.06 | 1.48 | 1.20 | 1.22  | 0.96 | 1.56 | 1.07 |
| Luxembourg  | 0.38             | 1.15 | 0.47 | 1.06 | 0.29 | 0.86 | 0.35 | 0.79 | 0.47 | 1.45 | 0.59 | 1.29 | 0.22 | 0.67 | 0.25 | 0.61 | 0.28  | 0.86 | 0.31 | 0.77 |
| Hungary     | 1.52             | 1.18 | 1.80 | 1.61 | 1.22 | 0.95 | 1.55 | 1.29 | 2.57 | 2.02 | 2.92 | 2.73 | 0.85 | 0.66 | 1.06 | 0.91 | 0.98  | 0.76 | 1.19 | 1.04 |
| Malta       | 2.24             | 1.84 | 2.67 | 1.29 | 2.07 | 1.70 | 2.52 | 1.19 | 1.82 | 1.54 | 2.33 | 1.04 | 1.48 | 1.23 | 1.69 | 0.85 | 1.49  | 1.24 | 1.70 | 0.86 |
| Netherlands | 0.85             | 0.77 | 0.95 | 0.92 | 0.75 | 0.68 | 0.85 | 0.82 | 1.58 | 1.44 | 1.77 | 1.72 | 0.57 | 0.51 | 0.62 | 0.61 | 0.90  | 0.81 | 1.11 | 0.97 |
| Austria     | 1.25             | 1.21 | 1.57 | 1.69 | 1.36 | 1.32 | 1.65 | 1.83 | 0.98 | 0.94 | 1.27 | 1.32 | 0.49 | 0.47 | 0.75 | 0.67 | 0.51  | 0.49 | 0.82 | 0.69 |
| Poland      | 5.58             | 4.54 | 6.40 | 2.29 | 5.48 | 4.45 | 6.27 | 2.25 | 4.22 | 3.38 | 4.91 | 1.73 | 1.88 | 1.47 | 2.33 | 0.77 | 2.00  | 1.57 | 2.46 | 0.82 |
| Portugal    | 2.02             | 1.70 | 2.60 | 0.75 | 2.02 | 1.69 | 2.62 | 0.75 | 2.83 | 2.42 | 3.73 | 1.05 | 2.02 | 1.70 | 2.61 | 0.75 | 1.97  | 1.67 | 2.57 | 0.73 |
| Romania     | 4.06             | 2.83 | 4.90 | 1.90 | 3.67 | 2.55 | 4.58 | 1.71 | 5.47 | 3.86 | 6.42 | 2.55 | 2.73 | 1.88 | 3.50 | 1.27 | 2.72  | 1.88 | 3.48 | 1.27 |
| Slovenia    | 7.93             | 6.02 | 9.56 | 5.15 | 4.98 | 3.91 | 5.92 | 3.24 | 1.02 | 0.84 | 1.13 | 0.66 | 1.25 | 1.03 | 1.55 | 0.81 | 1.00  | 0.83 | 1.13 | 0.65 |
| Slovakia    | 3.84             | 3.54 | 4.46 | 3.20 | 4.12 | 3.80 | 4.70 | 3.43 | 2.89 | 2.63 | 3.43 | 2.41 | 2.36 | 2.14 | 2.84 | 1.97 | 2.97  | 2.70 | 3.50 | 2.47 |
| Finland     | 2.43             | 2.25 | 2.76 | 2.76 | 2.11 | 1.95 | 2.42 | 2.40 | 1.21 | 1.11 | 1.45 | 1.37 | 0.68 | 0.62 | 0.88 | 0.78 | 0.65  | 0.59 | 0.79 | 0.74 |
| Sweden      | 0.34             | 0.32 | 0.54 | 0.59 | 0.41 | 0.38 | 0.63 | 0.70 | 0.66 | 0.62 | 0.75 | 1.14 | 0.38 | 0.35 | 0.59 | 0.65 | 0.57  | 0.52 | 0.64 | 0.98 |
| Norway      | 0.81             | 0.80 | 1.17 | 0.67 | 0.81 | 0.79 | 1.15 | 0.67 | 0.78 | 0.76 | 0.90 | 0.65 | 0.81 | 0.78 | 1.16 | 0.68 | 0.80  | 0.77 | 0.93 | 0.66 |



|             |      |      |      |      |      |      |      |      |      |      |      |      |      |      |      |      |      |      |      |      |
|-------------|------|------|------|------|------|------|------|------|------|------|------|------|------|------|------|------|------|------|------|------|
| Switzerland | 4.00 | 4.06 | 4.30 | 8.69 | 3.69 | 3.74 | 3.90 | 8.03 | 0.93 | 0.91 | 0.98 | 2.03 | 0.58 | 0.57 | 0.65 | 1.27 | 0.43 | 0.42 | 0.53 | 0.94 |
|-------------|------|------|------|------|------|------|------|------|------|------|------|------|------|------|------|------|------|------|------|------|
